# Supplementary material
Source: MDPI journal article supplement (https://www.mdpi.com/2073-4344/13/4/691)
Supplement: s1 [file s1]

## Catalysts

### Enzymatic synthesis of ascorbic acid-ketone bodies hybrids.

Valentina Venturi, Lindomar Alberto Lerin, Francesco Presini, Pier Paolo Giovannini, Martina Catani, Alessandro Buratti, Nicola Marchetti, Latha Nagamani Dilliraj, Simona Aprile.

## Supplementary Materials

### Contents

|                                                                                                                                                                                                                                                                                                                                                                             |           |
|-----------------------------------------------------------------------------------------------------------------------------------------------------------------------------------------------------------------------------------------------------------------------------------------------------------------------------------------------------------------------------|-----------|
| <sup>1</sup> H- and <sup>13</sup> C-NMR spectra of compound <b>3</b>                                                                                                                                                                                                                                                                                                        | Figure S1 |
| <sup>1</sup> H- and <sup>13</sup> C-NMR spectra of compound <b>5</b>                                                                                                                                                                                                                                                                                                        | Figure S2 |
| <sup>1</sup> H- and <sup>13</sup> C-NMR spectra of compound <b>8c</b>                                                                                                                                                                                                                                                                                                       | Figure S3 |
| ESI-MS spectra of the reaction mixtures of the esterification of <b>2</b> performed with 15 equivalents of <b>4</b> (after 3 hours)                                                                                                                                                                                                                                         | Figure S4 |
| <sup>1</sup> H NMR (selected data) of the reaction mixture performed with equimolar amounts of <b>2</b> and <b>4</b> after 4 hours. <sup>1</sup> H NMR (selected data) of the reaction mixture performed with 2 equivalents of <b>4</b> after 3.5 hours. <sup>1</sup> H NMR (selected data) of the reaction mixture performed with 3 equivalents of <b>4</b> after 3 hours. | Figure S5 |
| <sup>1</sup> H-NMR analyses (selected data) for the time course study of the esterification of <b>2</b> performed with 2 equivalents of <b>4</b>                                                                                                                                                                                                                            | Figure S6 |
| HPLC Chromatogram of the reaction mixture of the esterification of <b>2</b> performed with 2 equivalents of <b>4</b>                                                                                                                                                                                                                                                        | Figure S7 |

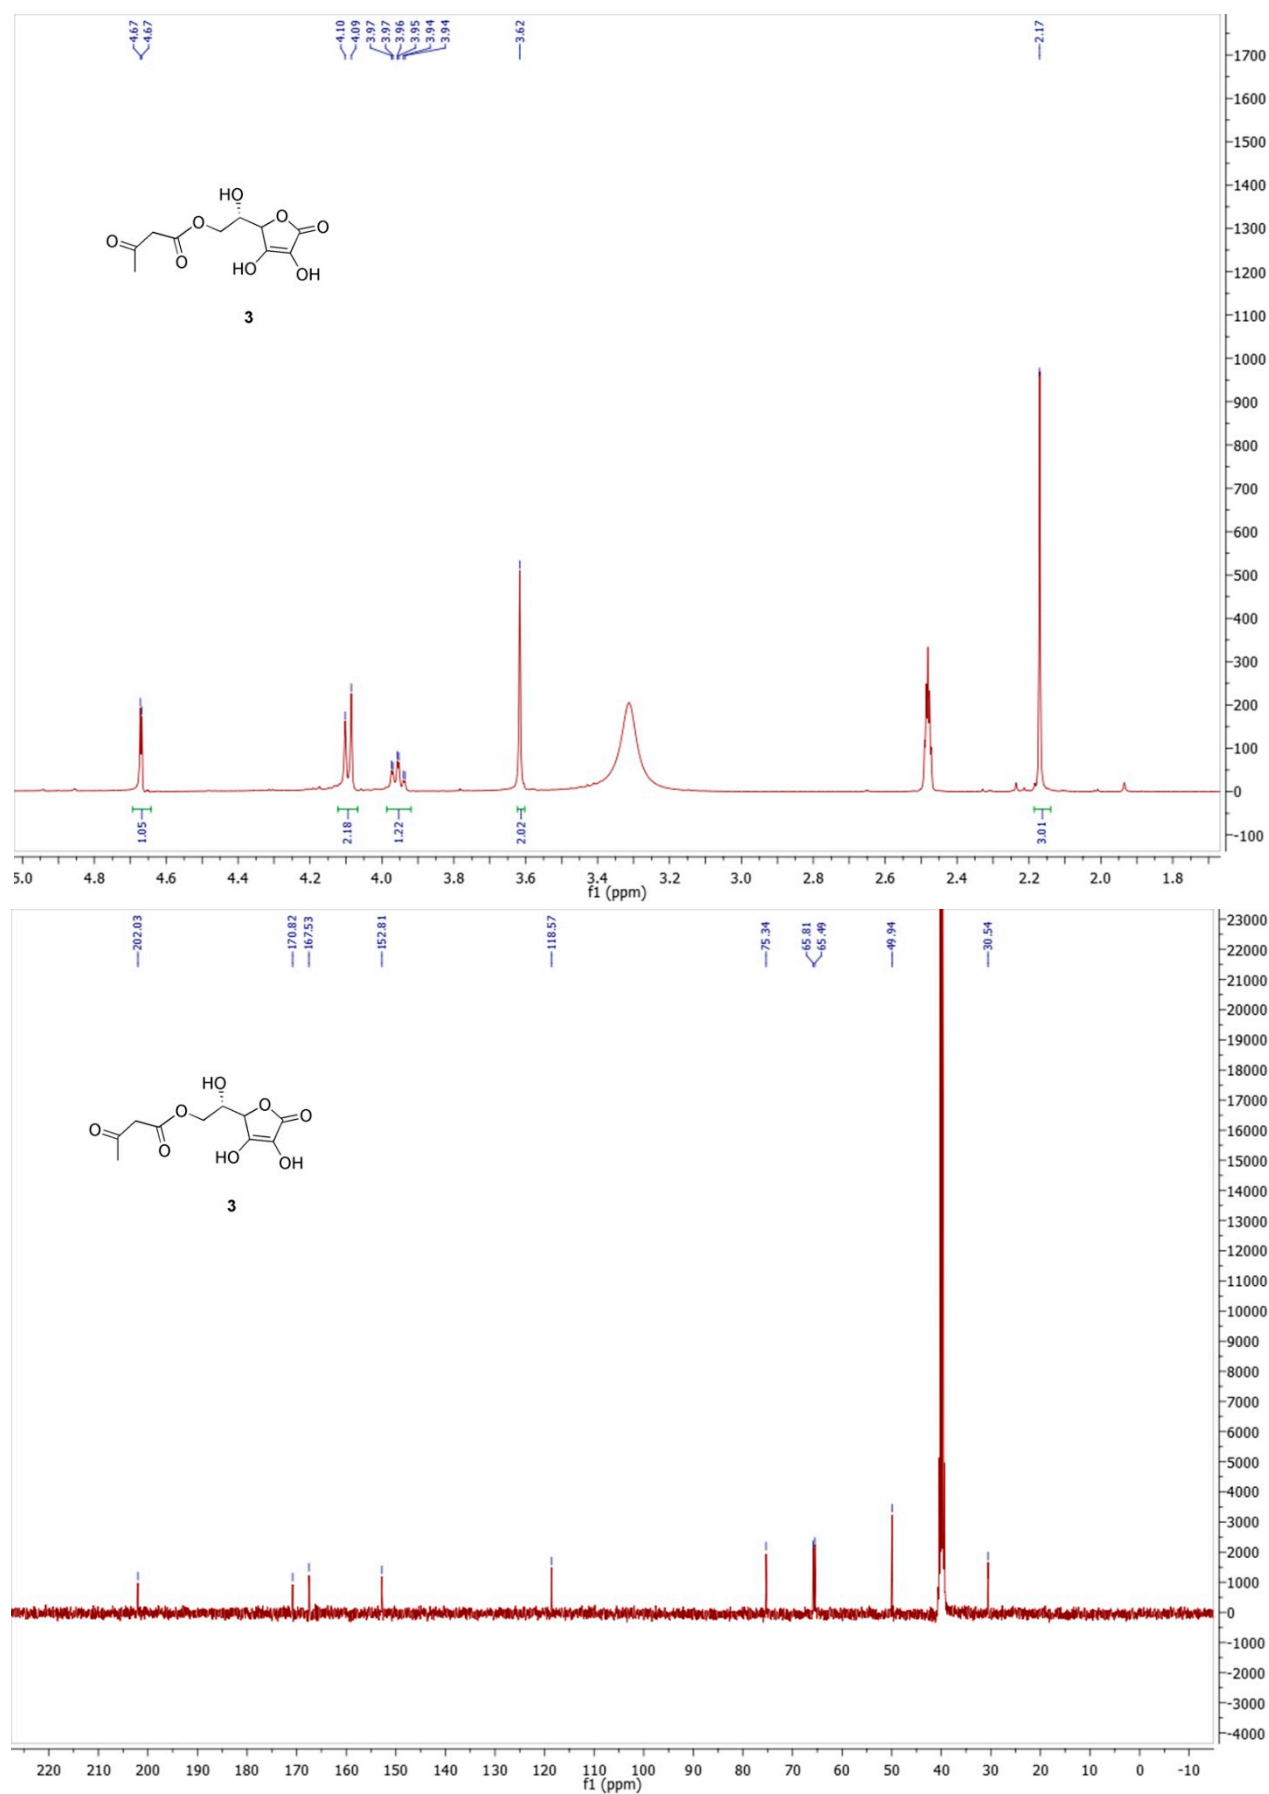

**Figure S1.** <sup>1</sup>H- and <sup>13</sup>C-NMR spectra of compound 3

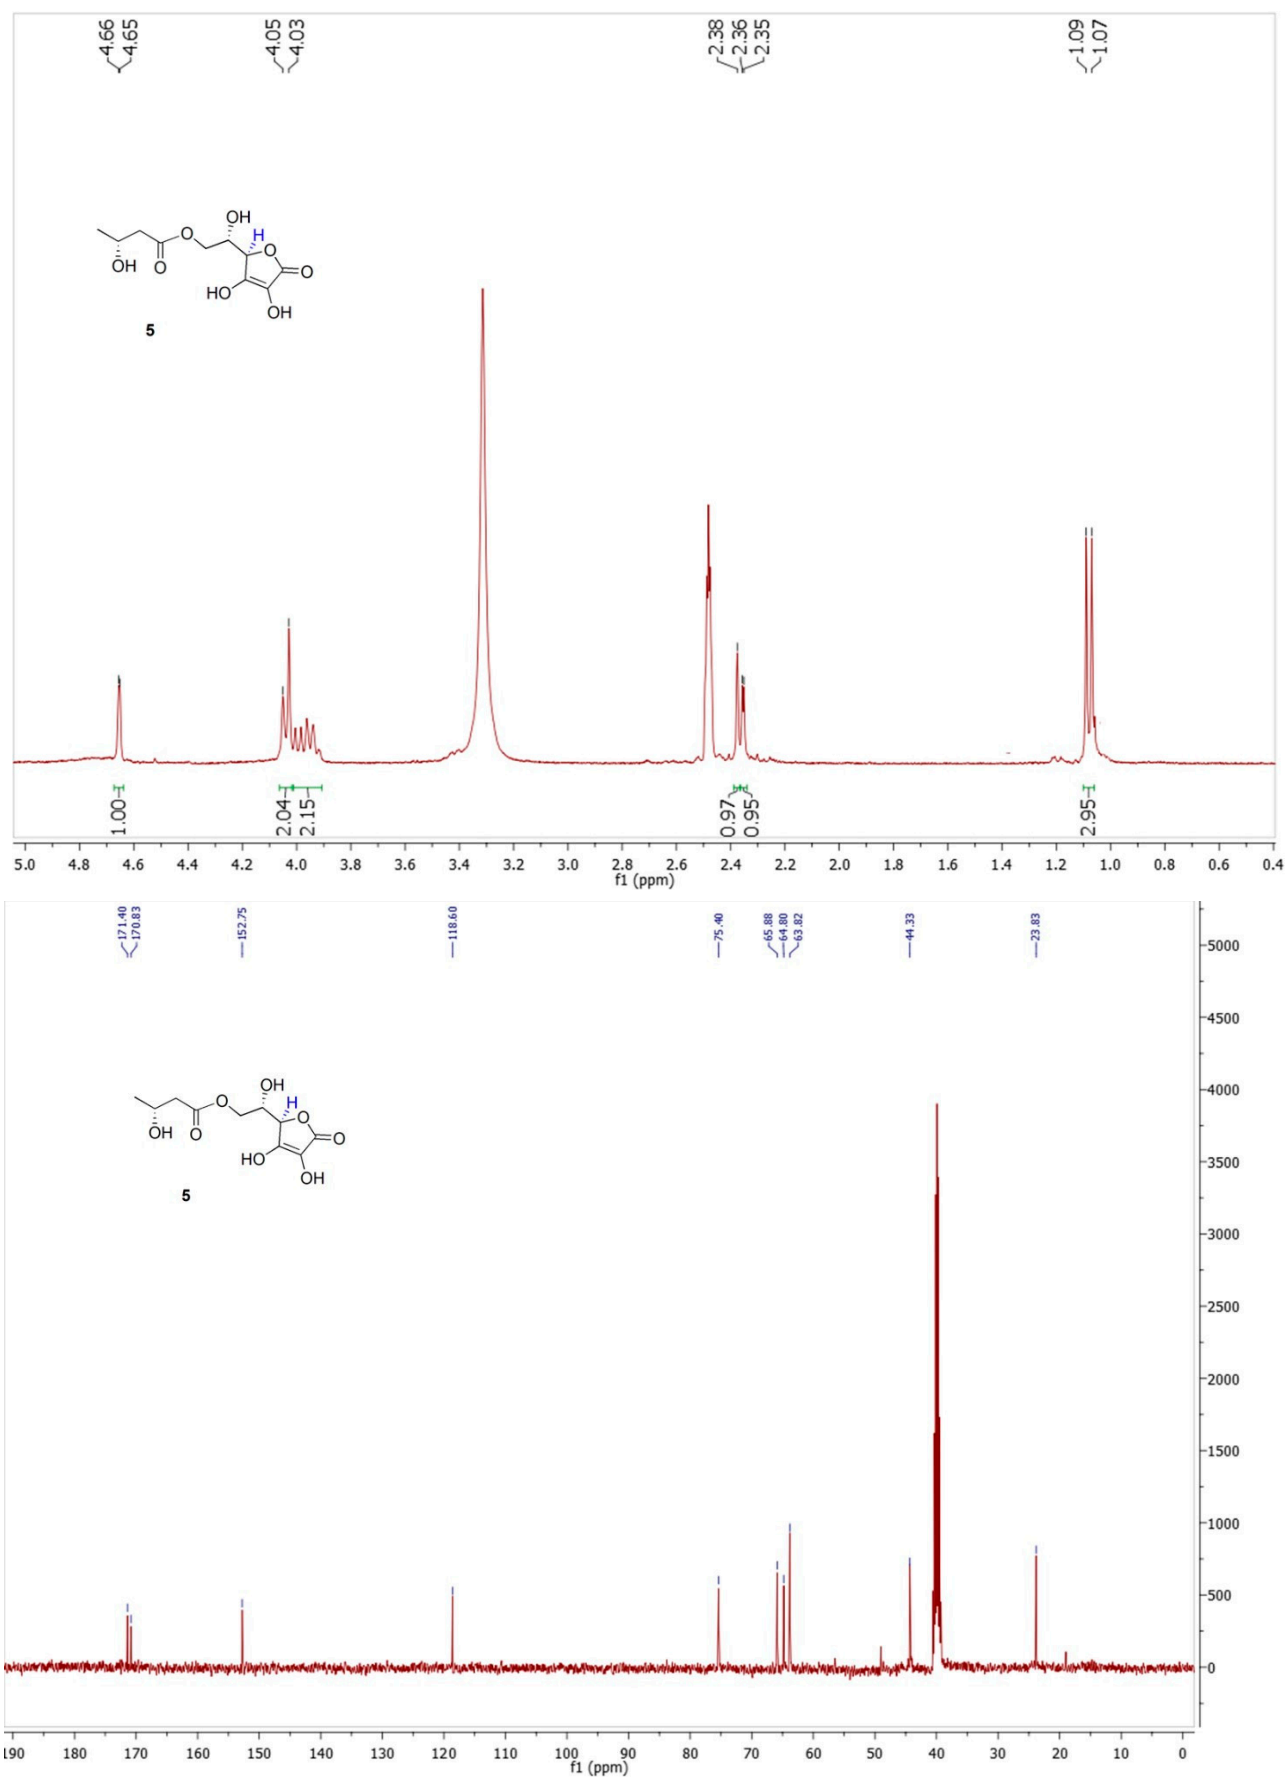

**Figure S2.** <sup>1</sup>H- and <sup>13</sup>C-NMR spectra of compound 5.

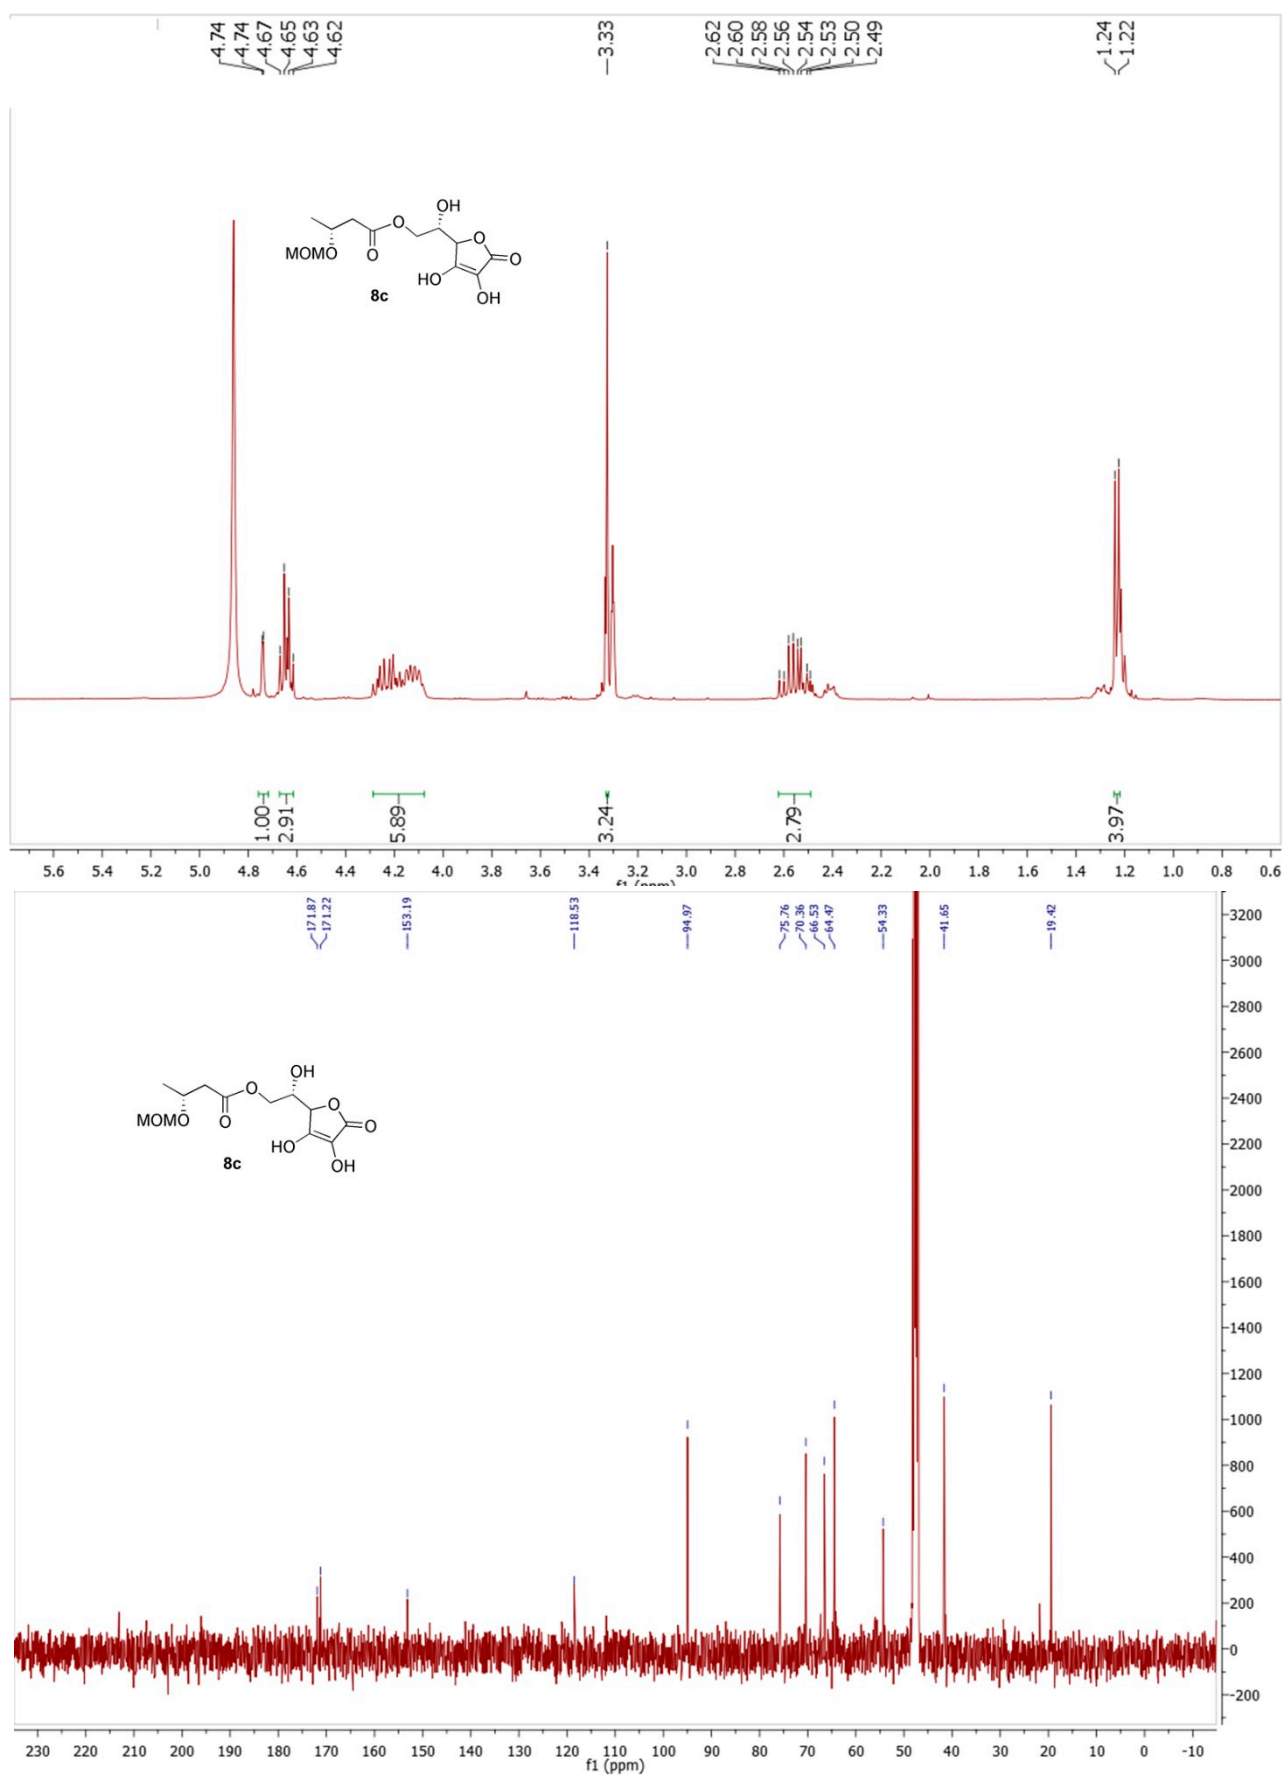

**Figure S3.** <sup>1</sup>H- and <sup>13</sup>C-NMR spectra of compound **8c**.

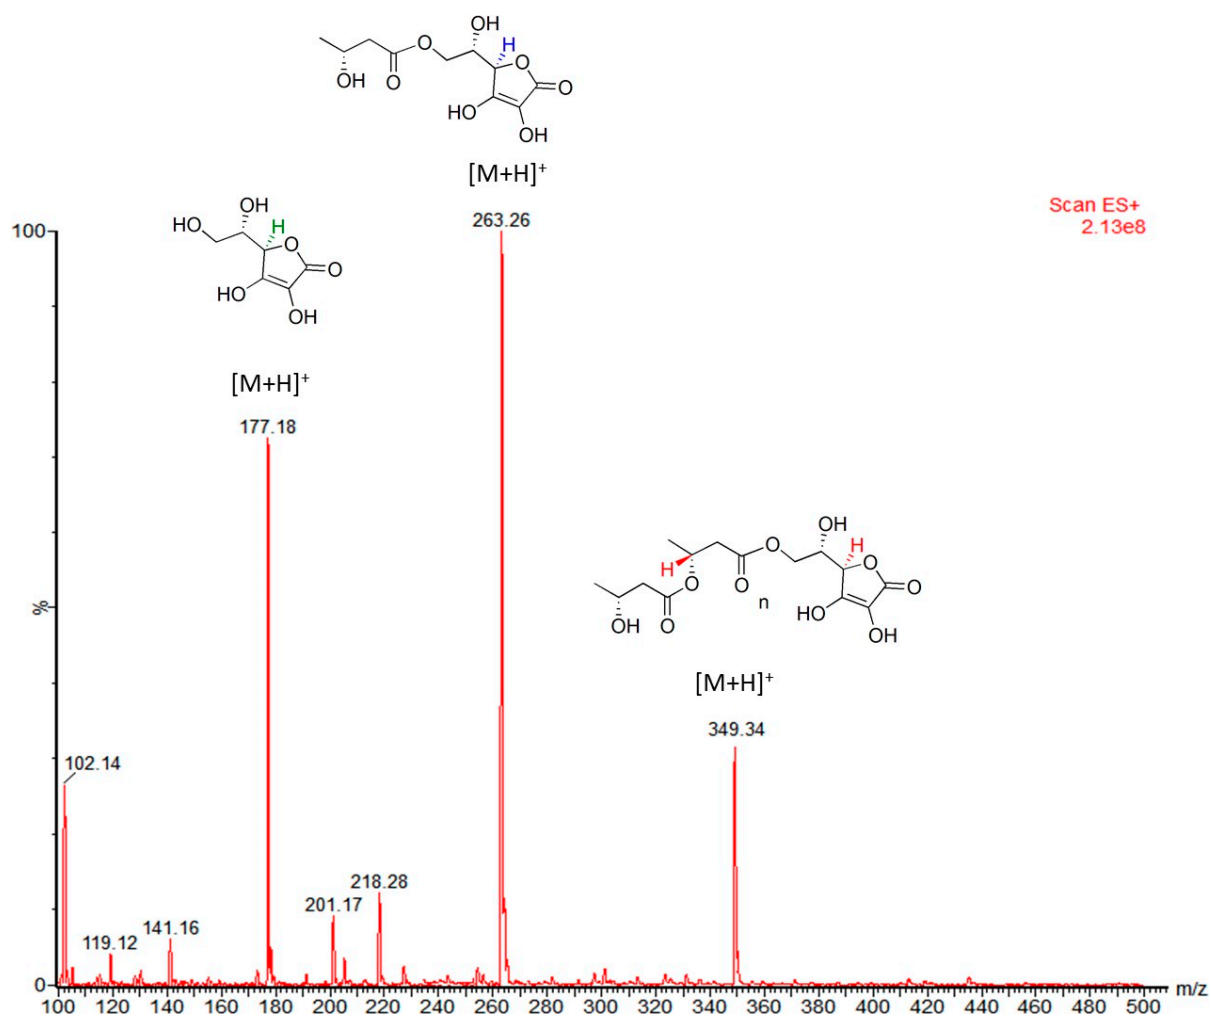

**Figure S4.** ESI-MS spectra of the reaction mixtures of the esterification of **2** performed with 16 equivalents of **4** (reaction stopped after 3 hours)

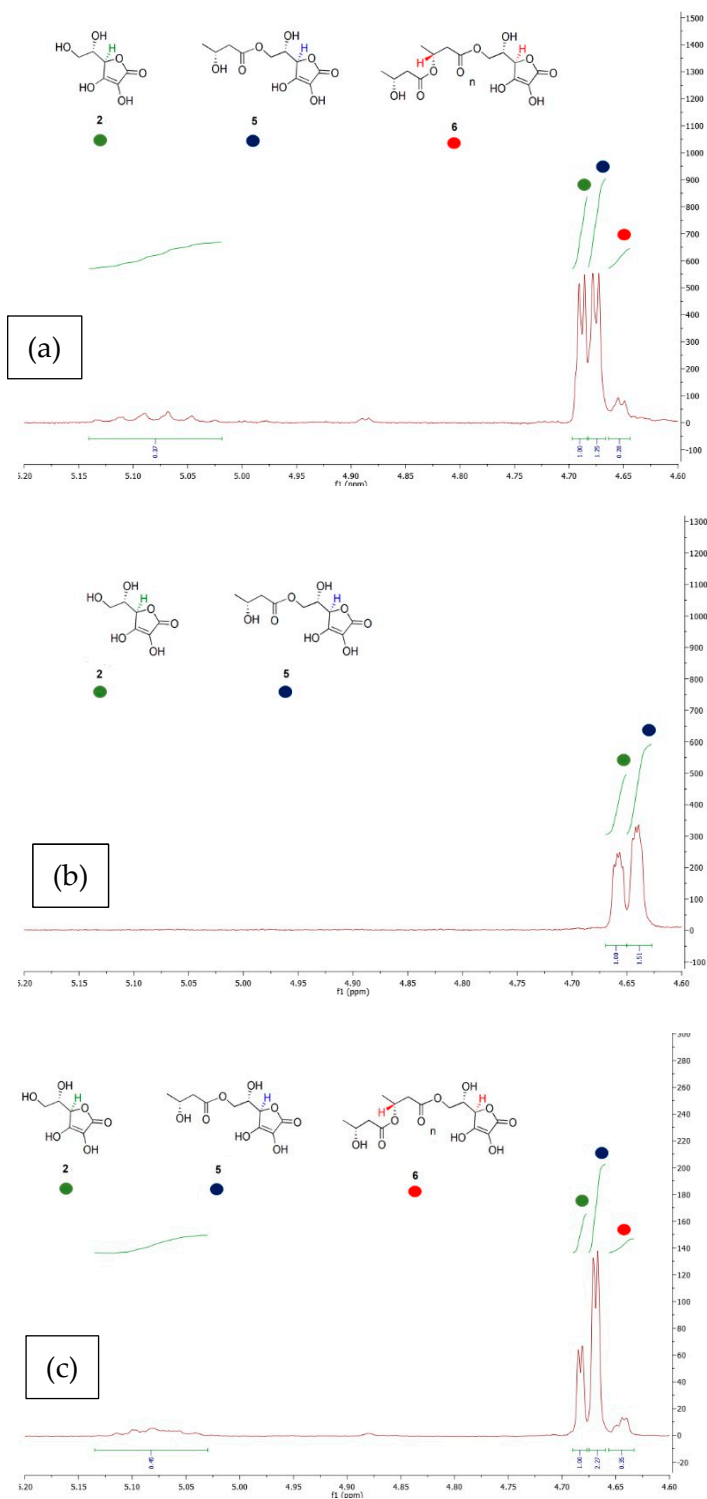

**Figure S5.** (a)  $^1\text{H}$  NMR (selected data) of the reaction mixture performed with equimolar amounts of **2** and **4** after 4 hours. (b)  $^1\text{H}$  NMR (selected data) of the reaction mixture performed with 2 equivalents of **4** after 3.5 hours. (c)  $^1\text{H}$  NMR (selected data) of the reaction mixture performed with 3 equivalents of **4** after 3 hours.

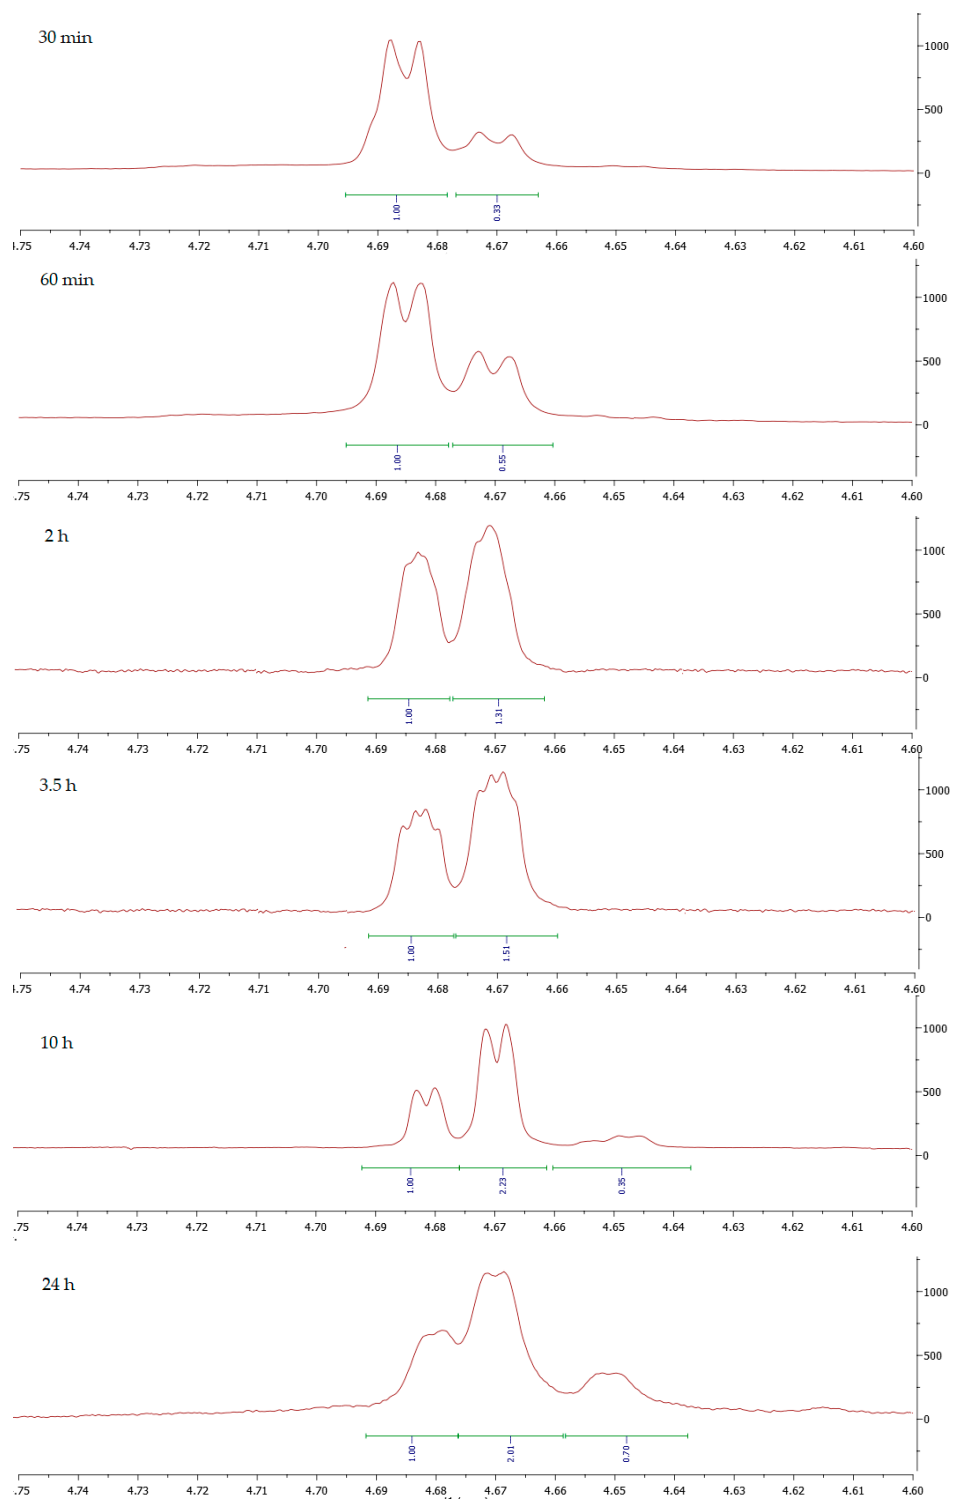

**Figure S6.**  $^1\text{H}$ -NMR analyses (selected data) for the time course study of the esterification of **2** performed with 2 equivalents of **4**

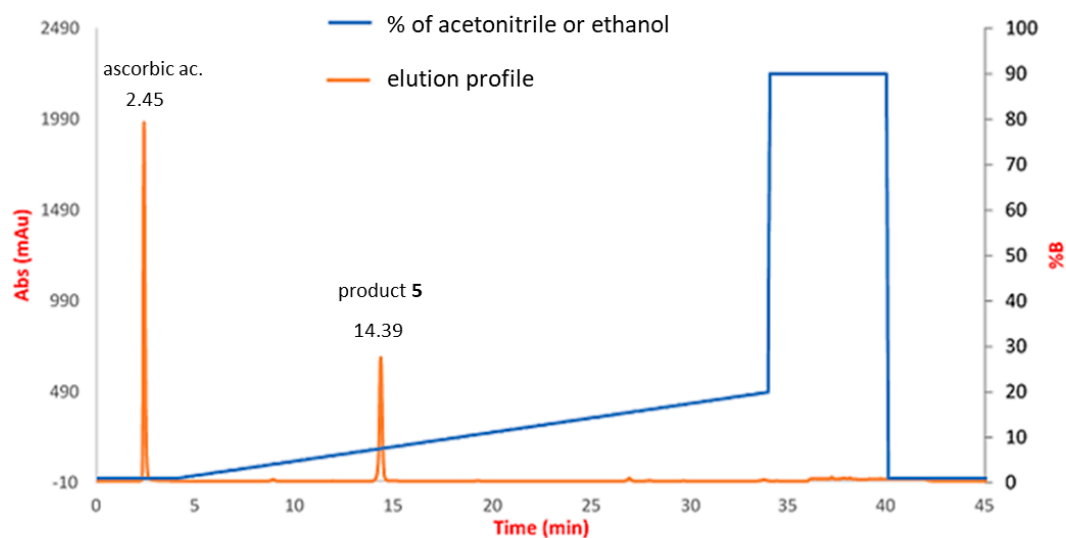

**Column:** Zorbax SB-C18 150 × 4.6 mm

**Flow rate:** 1 mL/min,

**Mobile phase:** water/acetonitrile (or ethanol) + 0.05% formic acid

**Acetonitrile (or ethanol) gradient:** i) isocratic at 1% for 4 min; ii) from 1% to 20% in 30 min; iii) washing at 90%.

**Figure S7.** HPLC chromatogram of the esterification of 2 performed with 2 equivalents of 4
